# Supplementary material
Source: Springer Nature journal article supplement (https://www.springermedizin.de/resource/supplementary/13012_2013_754_MOESM1_ESM.pdf/9630586)
Supplement: MOESM1 [file 9630586]

## Additional file 1 – Initial questionnaire

| Domain |                                              | Constructs                                                                   | Items                                                                                                                                                               | Source                                                          |
|--------|----------------------------------------------|------------------------------------------------------------------------------|---------------------------------------------------------------------------------------------------------------------------------------------------------------------|-----------------------------------------------------------------|
| D1     | Knowledge                                    | Knowledge (1)                                                                | 1. I know how to deliver [PA intervention] following the guidelines                                                                                                 | Adapted from Amemori et al. [37]<br>Adapted from Wännström [66] |
|        |                                              |                                                                              | Role clarity(3)                                                                                                                                                     |                                                                 |
|        |                                              | 3. With regard to [PA intervention] I know what my responsibilities are      |                                                                                                                                                                     |                                                                 |
|        |                                              | 4. In my work with [PA intervention] I know exactly what is expected from me |                                                                                                                                                                     |                                                                 |
| D2     | Skills                                       | Skills (3)                                                                   | 5. I have been trained in delivering [PA intervention] following the guidelines                                                                                     | New items                                                       |
|        |                                              |                                                                              | 6. I have the skills to deliver [PA intervention] following the guidelines                                                                                          |                                                                 |
|        |                                              |                                                                              | 7. I am practiced to deliver [PA intervention] following the guidelines                                                                                             |                                                                 |
| D3     | Social/<br>professional role<br>and identity | Professional role (3)                                                        | 8. Delivering [PA intervention] following the guidelines is part of my work as a PT                                                                                 | New items                                                       |
|        |                                              |                                                                              | 9. As a PT it is my job to deliver [PA intervention] following the guidelines                                                                                       |                                                                 |
|        |                                              |                                                                              | 10. It is my responsibility as a PT to deliver [PA intervention] following the guidelines                                                                           |                                                                 |
| D4     | Beliefs about<br>capabilities                | Self-efficacy (4)                                                            | 11. I am confident that I can deliver [PA intervention] following the guidelines                                                                                    | Adapted from Bandura [42]                                       |
|        |                                              |                                                                              | 12. I am confident that I can deliver [PA intervention] following the guidelines even when other professionals with whom I deliver [PA intervention] do not do this |                                                                 |
|        |                                              |                                                                              | 13. I am confident that I can deliver [PA intervention] following the guidelines even when there is little time                                                     |                                                                 |
|        |                                              |                                                                              | 14. I am confident that I can deliver [PA intervention] following the guidelines even when participants are not motivated                                           |                                                                 |
|        |                                              | Perceived<br>Behavioral Control<br>(7)                                       | 15. I have control over delivering [PA intervention] following the guidelines                                                                                       | Adapted from Ajzen [41]                                         |
|        |                                              |                                                                              | 16. For me, delivering [PA intervention] following the guidelines is (very difficult – very easy)                                                                   |                                                                 |
|        |                                              |                                                                              | 17. For me, performing the intake is (very difficult – very easy)                                                                                                   |                                                                 |
|        |                                              |                                                                              | 18. For me, delivering the training program is (very difficult – very easy)                                                                                         |                                                                 |

|    |                            |                          |                                                                                                                                                                                                                                                                                                                                                                                                                                                                                                                                                                                                        |                                                                                   |
|----|----------------------------|--------------------------|--------------------------------------------------------------------------------------------------------------------------------------------------------------------------------------------------------------------------------------------------------------------------------------------------------------------------------------------------------------------------------------------------------------------------------------------------------------------------------------------------------------------------------------------------------------------------------------------------------|-----------------------------------------------------------------------------------|
|    |                            | Optimism (3)             | <p>19. For me, performing the evaluation is (very difficult – very easy)</p> <p>20. For me, giving attention to participant’s maintenance of PA behavior outside [PA intervention] is (very difficult – very easy)</p> <p>21. For me, reporting about the [PA intervention] to the referring professional is (very difficult – very easy)</p> <p>22. In my work as a PT, in uncertain times, I usually expect the best</p> <p>23. In my work as a PT, I’m always optimistic about the future</p> <p>24. In my work as a PT, overall, I expect more good things to happen than bad</p>                  | Adapted from Scheier et al. [48]                                                  |
| D5 | Beliefs about consequences | Attitude (4)             | <p>25. For me, delivering [PA intervention] following the guidelines is (not useful at all – very useful)</p> <p>26. For me, delivering [PA intervention] following the guidelines is (not worthwhile at all – very worthwhile)</p> <p>27. For me, delivering [PA intervention] following the guidelines is (not pleasurable at all – very pleasurable)</p> <p>28. For me, delivering [PA intervention] following the guidelines is (not interesting at all – very interesting)</p>                                                                                                                    | Adapted from Ajzen [41]                                                           |
|    |                            | Outcome expectancies (5) | <p>29. If I deliver [PA intervention] following the guidelines [PA intervention] will be most effective</p> <p>30. If I deliver [PA intervention] following the guidelines participants will appreciate this</p> <p>31. If I deliver [PA intervention] following the guidelines this will strengthen the collaboration with professionals with whom I deliver [PA intervention]</p> <p>32. If I deliver [PA intervention] following the guidelines I will feel satisfied</p> <p>33. If I deliver [PA intervention] following the guidelines it will help participants to be more physically active</p> | Adapted from Bandura [42]                                                         |
|    |                            | Reinforcement (3)        | <p>34. When I deliver [PA intervention] following the guidelines, I get financial reimbursement</p> <p>35. When I deliver [PA intervention] following the guidelines, I get recognition from the work context</p> <p>36. When I deliver [PA intervention] following the guidelines, I get recognition from participants</p>                                                                                                                                                                                                                                                                            | Content based on Huijg, van der Zouwe et al. [43] and Huijg, Gebhardt et al. [13] |
| D6 | Motivation and goals       | Intention (3)            | <p>37. I intend to deliver [PA intervention] following the guidelines in the next three months</p> <p>38. I will definitely deliver [PA intervention] following the guidelines</p>                                                                                                                                                                                                                                                                                                                                                                                                                     | Adapted from Ajzen [41]                                                           |

|    |                                           |                                                    |                                                                                                                                        |                                                                                                |
|----|-------------------------------------------|----------------------------------------------------|----------------------------------------------------------------------------------------------------------------------------------------|------------------------------------------------------------------------------------------------|
|    |                                           |                                                    | in the next three months                                                                                                               |                                                                                                |
|    |                                           | Priority (3)                                       | 39. How strong is your intention to deliver [PA intervention] following the guidelines in the next three months                        |                                                                                                |
|    |                                           |                                                    | 40. How often is working on something else on your agenda a higher priority than delivering [PA intervention] following the guidelines | New items                                                                                      |
|    |                                           |                                                    | 41. How often is delivering [PA intervention] following the guidelines more important than working on something else on your agenda    |                                                                                                |
|    |                                           |                                                    | 42. How often is working on something else on your agenda more urgent than delivering [PA intervention] following the guidelines       |                                                                                                |
| D7 | Memory, attention, and decision processes | Memory (2)                                         | 43. Delivering [PA intervention] following the guidelines is something I seldom forget                                                 | New items                                                                                      |
|    |                                           |                                                    | 44. Delivering [PA intervention] following the guidelines is something I often forget                                                  |                                                                                                |
| D8 | Environmental context and resources       | Characteristics of the innovation (6)              | 45. It is possible to tailor [PA intervention] to participants' needs                                                                  | New items                                                                                      |
|    |                                           |                                                    | 46. It is possible to tailor [PA intervention] to professionals' needs                                                                 |                                                                                                |
|    |                                           |                                                    | 47. [PA intervention] costs little time to deliver                                                                                     | Content based on Rogers [11], Huijg, van der Zouwe et al. [43] and Huijg, Gebhardt et al. [13] |
|    |                                           |                                                    | 48. [PA intervention] is compatible with daily practice                                                                                |                                                                                                |
|    |                                           |                                                    | 49. [PA intervention] is simple to deliver                                                                                             |                                                                                                |
|    |                                           |                                                    | 50. [PA intervention] has advantages compared to standard care                                                                         |                                                                                                |
|    |                                           | Characteristics of the socio-political context (4) | 51. Government and local authorities provide sufficient support to interventions such as [PA intervention]                             |                                                                                                |
|    |                                           |                                                    | 52. Insurance companies provide sufficient support to interventions such as [PA intervention]                                          |                                                                                                |
|    |                                           |                                                    | 53. PHC is sufficiently oriented towards prevention                                                                                    |                                                                                                |
|    |                                           |                                                    | 54. There is a good collaboration between professionals who deliver [PA intervention]                                                  |                                                                                                |
|    |                                           | Characteristics of the organization (4)            | 55. In the organization I work, are sufficient potential participants of [PA intervention] present                                     |                                                                                                |
|    |                                           |                                                    | 56. In the organization I work, is enough time to deliver [PA intervention]                                                            |                                                                                                |
|    |                                           |                                                    | 57. In the organization I work, all necessary resources are available to deliver [PA intervention]                                     |                                                                                                |
|    |                                           |                                                    | 58. In the organization I work, there is a good collaboration between professionals who deliver [PA intervention]                      |                                                                                                |
|    |                                           | Characteristics of the [PA intervention]           | 59. I know participants of [PA intervention] personally                                                                                |                                                                                                |
|    |                                           |                                                    | 60. Participants of [PA intervention] are motivated                                                                                    |                                                                                                |

|    |                   |                                                |                                                                                                                                                                        |                                   |
|----|-------------------|------------------------------------------------|------------------------------------------------------------------------------------------------------------------------------------------------------------------------|-----------------------------------|
|    |                   | participants (3)                               | 61. Participants of [PA intervention] are positive about [PA intervention]                                                                                             |                                   |
|    |                   | Characteristics of the innovation strategy (7) | 62. [Implementing organization] provides professionals with a training to deliver [PA intervention]                                                                    |                                   |
|    |                   |                                                | 63. [Implementing organization] provides the possibility to experience delivering [PA intervention] before professionals need to commit to it                          |                                   |
|    |                   |                                                | 64. [Implementing organization] provides sufficient intervention materials                                                                                             |                                   |
|    |                   |                                                | 65. [Implementing organization] provides assistance to professionals with delivering [PA intervention]                                                                 |                                   |
|    |                   |                                                | 66. [Implementing organization] organizes intervision meetings for professionals                                                                                       |                                   |
|    |                   |                                                | 67. [Implementing organization] provides sufficient financial reimbursement to professionals for [PA intervention] delivery                                            |                                   |
|    |                   |                                                | 68. [Implementing organization] provides insights into results of [PA intervention]                                                                                    |                                   |
| D9 | Social influences | Subjective norm (2)                            | 69. Most people who are important to me think that I should deliver [PA intervention] following the guidelines                                                         | Adapted from Ajzen [41]           |
|    |                   |                                                | 70. Professionals with whom I deliver [PA intervention] think I should deliver [PA] intervention following the guidelines                                              |                                   |
|    |                   | Descriptive norm (2)                           | 71. Professionals with whom I deliver [PA intervention] deliver [PA] intervention following the guidelines                                                             | Adapted from Cialdini et al. [49] |
|    |                   |                                                | 72. Other professionals who work with [PA intervention] deliver [PA intervention] following the guidelines                                                             |                                   |
|    |                   | Social support (6)                             | 73. I can count on support from professionals with whom I deliver [PA intervention] when things get tough around delivering [PA intervention] following the guidelines | Adapted from Frese [45]           |
|    |                   |                                                | 74. Professionals with whom I deliver [PA intervention] are willing to listen to my problems with delivering [PA intervention] following the guidelines                |                                   |
|    |                   |                                                | 75. Professionals with whom I deliver [PA intervention] are helpful with delivering [PA intervention] following the guidelines                                         |                                   |
|    |                   |                                                | 76. I can count on support from the management of the organization I work in, when things get tough around delivering [PA intervention] following the guidelines       |                                   |
|    |                   |                                                | 77. The management of the organization I work in is willing to listen to my problems with delivering [PA intervention] following the                                   |                                   |

|     |                         |                     |                                                                                                                                                                                                                                                                                                                                                                                                                                                                                                                                                                                                                                                                                                                       |                                                                                                                         |
|-----|-------------------------|---------------------|-----------------------------------------------------------------------------------------------------------------------------------------------------------------------------------------------------------------------------------------------------------------------------------------------------------------------------------------------------------------------------------------------------------------------------------------------------------------------------------------------------------------------------------------------------------------------------------------------------------------------------------------------------------------------------------------------------------------------|-------------------------------------------------------------------------------------------------------------------------|
|     |                         |                     | guidelines                                                                                                                                                                                                                                                                                                                                                                                                                                                                                                                                                                                                                                                                                                            |                                                                                                                         |
|     |                         |                     | 78. The management of the organization I work in is helpful with delivering [PA intervention] following the guidelines                                                                                                                                                                                                                                                                                                                                                                                                                                                                                                                                                                                                |                                                                                                                         |
| D10 | Emotion                 | Emotions (12)       | 79. When I work with [PA intervention] I feel nervous<br>80. When I work with [PA intervention] I feel optimistic<br>81. When I work with [PA intervention] I feel pessimistic<br>82. When I work with [PA intervention] I feel comfortable<br>83. When I work with [PA intervention] I feel depressed<br>84. When I work with [PA intervention] I feel calm<br>85. When I work with [PA intervention] I feel agitated<br>86. When I work with [PA intervention] I feel sad<br>87. When I work with [PA intervention] I feel relaxed<br>88. When I work with [PA intervention] I feel uncomfortable<br>89. When I work with [PA intervention] I feel cheerful<br>90. When I work with [PA intervention] I feel elated | Adapted from van Veldhoven [44]                                                                                         |
| D11 | Behavioral regulation   | Action planning (3) | 91. I have a clear plan of how I will deliver [PA intervention] following the guidelines<br>92. I have a clear plan under what circumstances I will deliver [PA intervention] following the guidelines<br>93. I have a clear plan when I will deliver [PA intervention] following the guidelines                                                                                                                                                                                                                                                                                                                                                                                                                      | Adapted from Sniehotta et al. [47]                                                                                      |
|     |                         | Coping planning (3) | 94. I have a clear plan with regard to delivering [PA intervention] following the guidelines when participants are not motivated<br>95. I have a clear plan with regard to delivering [PA intervention] following the guidelines when there is little time<br>96. I have a clear plan with regard to delivering [PA intervention] following the guidelines when other professionals with whom I deliver [PA intervention] do not do this                                                                                                                                                                                                                                                                              | Adapted from Sniehotta et al. [47]<br>Content based on Huijg, van der Zouwe et al. [43] and Huijg, Gebhardt et al. [13] |
| D12 | Nature of the behaviors | Automaticity (4)    | 97. Delivering [PA intervention] following the guidelines is something I do automatically<br>98. Delivering [PA intervention] following the guidelines is something I do without having to consciously remember<br>99. Delivering [PA intervention] following the guidelines is something I do without thinking<br>100. Delivering [PA intervention] following the guidelines is something I start doing before I realize I am doing it                                                                                                                                                                                                                                                                               | Gardner et al. [46]                                                                                                     |

Note. PA, physical activity; PT, physical therapist; PHC, primary health care
